# Supplementary material for: A Possible Way to Relate the Effects of SARS-CoV-2-Induced Changes in Transferrin to Severe COVID-19-Associated Diseases
Source: Int J Mol Sci. 2022 May 31;23(11):6189. doi: 10.3390/ijms23116189 (PMC9181396; doi:10.3390/ijms23116189)
Supplement: Supplementary file 1 [file ijms-23-06189-s001.zip › ijms-1715157-supplementary.pdf]

## Supplementary materials

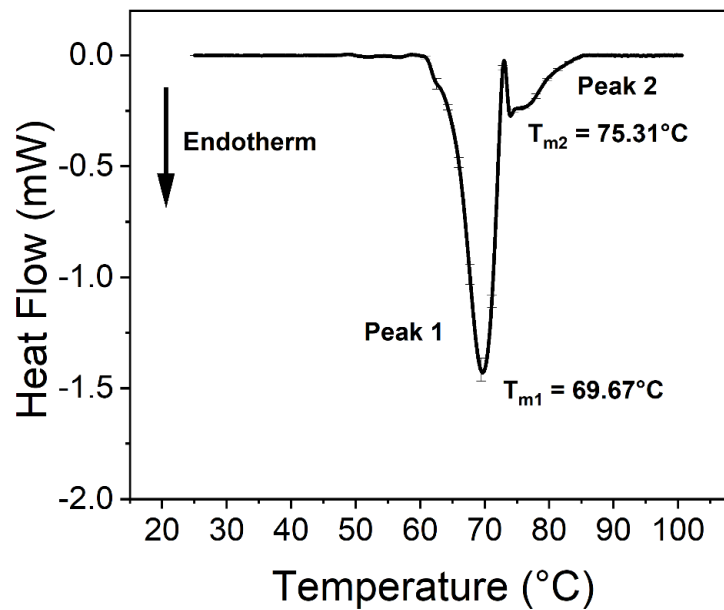

**Figure S1.** Thermal analysis of virus-treated anticoagulated whole blood samples after 2 hours of incubation. The plot is an average of the same measurements repeated at different incubation temperatures (24  $^{\circ}\text{C}$ , 37  $^{\circ}\text{C}$  and 40  $^{\circ}\text{C}$ ). The DSC data represent the mean  $\pm$  SD of three independent measurements ( $n = 3$ ).

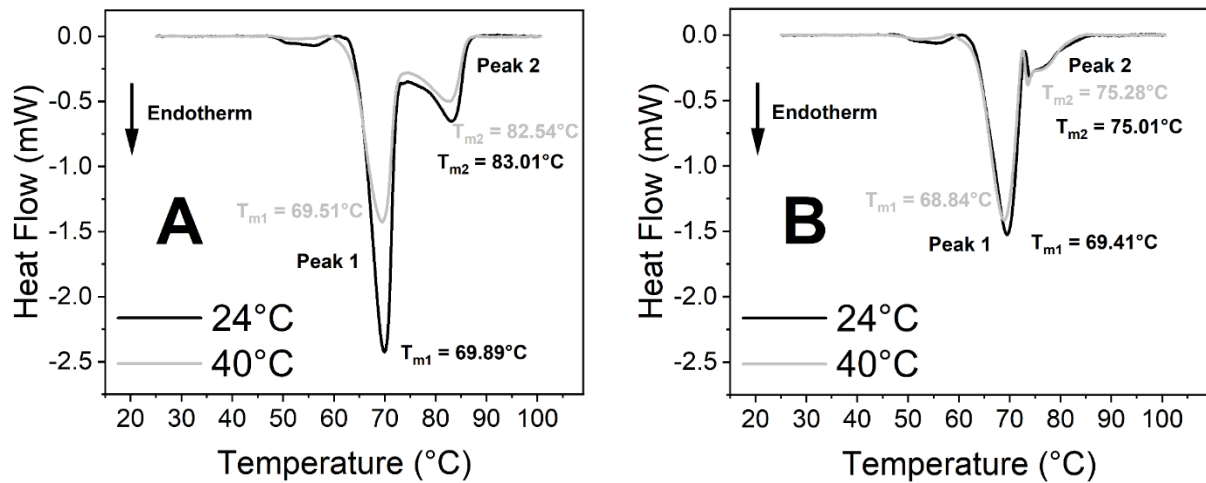

**Figure S2.** Thermal analysis of control (A) and virus-treated (B) anticoagulated whole blood samples after 50 hours of incubation at 24  $^{\circ}\text{C}$  and at 40  $^{\circ}\text{C}$ .

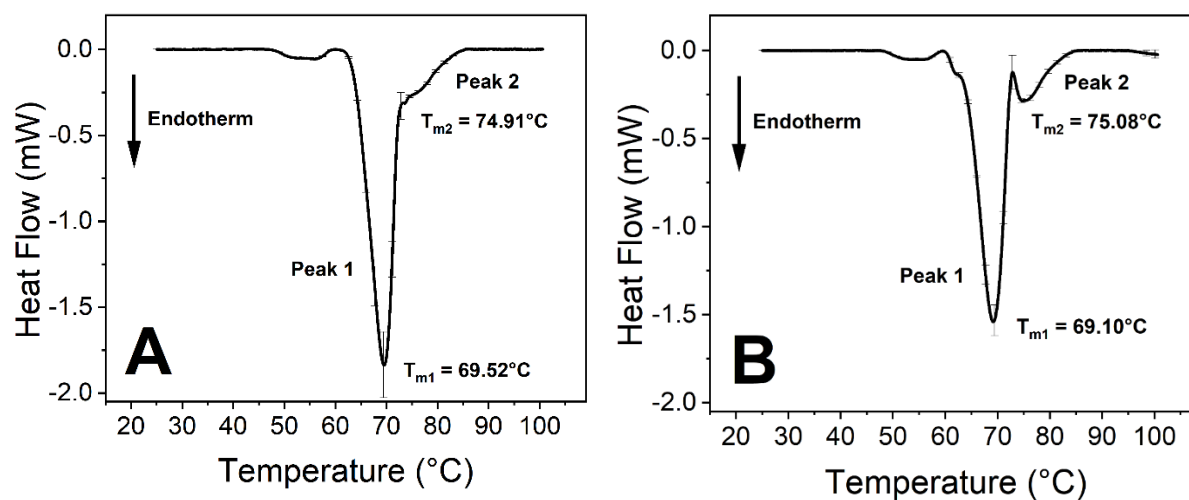

**Figure S3.** Thermal analysis of control (A) and virus-treated (B) anticoagulated whole blood samples after 15 hours of incubation at 37 °C. The DSC data represent the mean  $\pm$  SD of four independent measurements ( $n = 4$ ).

**Table S1.** Iron metabolism-related parameters of healthy whole blood. Data represent mean  $\pm$  SD.

| <b>Iron Metabolism-Related Blood Parameters of Healthy Volunteers</b> |                                   |                                              |
|-----------------------------------------------------------------------|-----------------------------------|----------------------------------------------|
| <b>Iron level (<math>\mu\text{mol/L}</math>)</b>                      | <b>Transferrin (g/L)</b>          | <b>Ferritin (<math>\mu\text{g/L}</math>)</b> |
| <u><math>21.65 \pm 2.20</math></u>                                    | <u><math>2.80 \pm 0.67</math></u> | <u><math>143.50 \pm 21.92</math></u>         |
